# Supplementary material
Source: ML conference proceedings conference paper supplement (https://openaccess.thecvf.com/content/CVPR2025/html/Chen_SlideChat_A_Large_CVPR_2025_paper.html)
Supplement: Supplementary file 1 [file Chen_SlideChat_A_Large_CVPR_2025_supplemental.pdf]

# SlideChat: A Large Vision-Language Assistant for Whole-Slide Pathology Image Understanding

## Supplementary Material

### 6. SlideInstruction and SlideBench

#### 6.1. Data Source

In this section, we present the sources of the constructed SlideInstruction and SlideBench, which are derived from ten TCGA datasets as well as the BCNB challenge dataset. The Tab. 4 provides a detailed overview of the specific number of WSIs.

Table 4. Datasets statistics

| Dataset   | WSIs | Report | Organ         | Purpose     |
|-----------|------|--------|---------------|-------------|
| TCGA-BRCA | 1068 | ✓      | Breast        | Train, Test |
| TCGA-LGG  | 783  | ✓      | Brain         | Train, Test |
| TCGA-GBM  | 513  | ✓      | Brain         | Train, Test |
| TCGA-LUAD | 506  | ✓      | Lung          | Train, Test |
| TCGA-LUSC | 474  | ✓      | Lung          | Train, Test |
| TCGA-HNSC | 464  | ✓      | Head and Neck | Train, Test |
| TCGA-BLCA | 424  | ✓      | Bladder       | Train, Test |
| TCGA-COAD | 419  | ✓      | Colon         | Train, Test |
| TCGA-READ | 157  | ✓      | Rectum        | Train, Test |
| TCGA-SKCM | 107  | ✓      | Skin          | Train, Test |
| BCNB      | 1058 | ✗      | Breast        | Test        |

#### 6.2. Data Statistics

We have compiled statistics on the number of VQA instances for each category within SlideBench VQA (TCGA) in Tab. 5. Each subcategory contains over 500 VQA instances, ensuring a robust representation across all areas, which supports comprehensive model evaluation and facilitates in-depth performance analysis. We provide an overview of the sample sizes and detailed original label information for the seven classification tasks within the BCNB dataset in Tab. 6.

#### 6.3. Curation Scope and Prompt

In this section, we illustrate the various dimensions of VQAs in SlideInstruction and SlideBench, ensuring comprehensive coverage of diverse pathological scenarios. This includes 3 broad categories and 13 narrow categories. Below are the contents for each category, which help to delineate their scope and meaning, thereby enabling GPT to extract high-quality question-answer pairs more effectively.

Table 5. The number of VQA corresponding to each category in SlideBench-VQA (TCGA).

| Broad Category | Narrow Category                     | Number |
|----------------|-------------------------------------|--------|
| Microscopy     | Tissue Architecture and Arrangement | 696    |
|                | Tumor Characteristics               | 562    |
|                | Cytomorphological Characteristics   | 601    |
|                | Histopathological Changes           | 633    |
| Diagnosis      | Disease Detection                   | 581    |
|                | Disease Classification              | 532    |
|                | Staging                             | 671    |
|                | Grading                             | 601    |
|                | Differential Diagnosis              | 586    |
| Clinical       | Treatment Guidance                  | 597    |
|                | Biomarker Analysis                  | 502    |
|                | Risk Factors                        | 591    |
|                | Prognostic Assessment               | 674    |

Table 6. The number and options of VQA corresponding to each task in SlideBench-VQA (BCNB).

| Task                 | Number | Option                                                              |
|----------------------|--------|---------------------------------------------------------------------|
| ER Status            | 1058   | Postive / Negative                                                  |
| HR Status            | 1058   | Postive / Negative                                                  |
| HER2 Status          | 1058   | Postive / Negative                                                  |
| HER2 Expression      | 1058   | 0 / 1+ / 2+ / 3+                                                    |
| Histological Grading | 926    | 1 / 2 / 3                                                           |
| Molecular Subtype    | 1058   | Luminal A / Luminal B / HER2(+) / Triple negative                   |
| Tumor Type           | 1058   | Invasive ductal carcinoma / Invasive lobular carcinoma / Other Type |

##### 6.3.1. Scope

**Microscopy** This category involves assessing the ability to generate microscopy descriptions of pathology images, focusing on clinically relevant features:

- **Tissue Architecture and Arrangement:** Questions in this category should evaluate the understanding of overall tissue structure and spatial organization within a histological section.
- **Cytomorphological Characteristics:** These questions should focus on the detailed description of individual cell morphology, including nuclear and cytoplasmic features.
- **Tumor Characteristics:** Questions under this category should assess the ability to identify and describe features specific to tumors, such as tumor differentiation, inva-

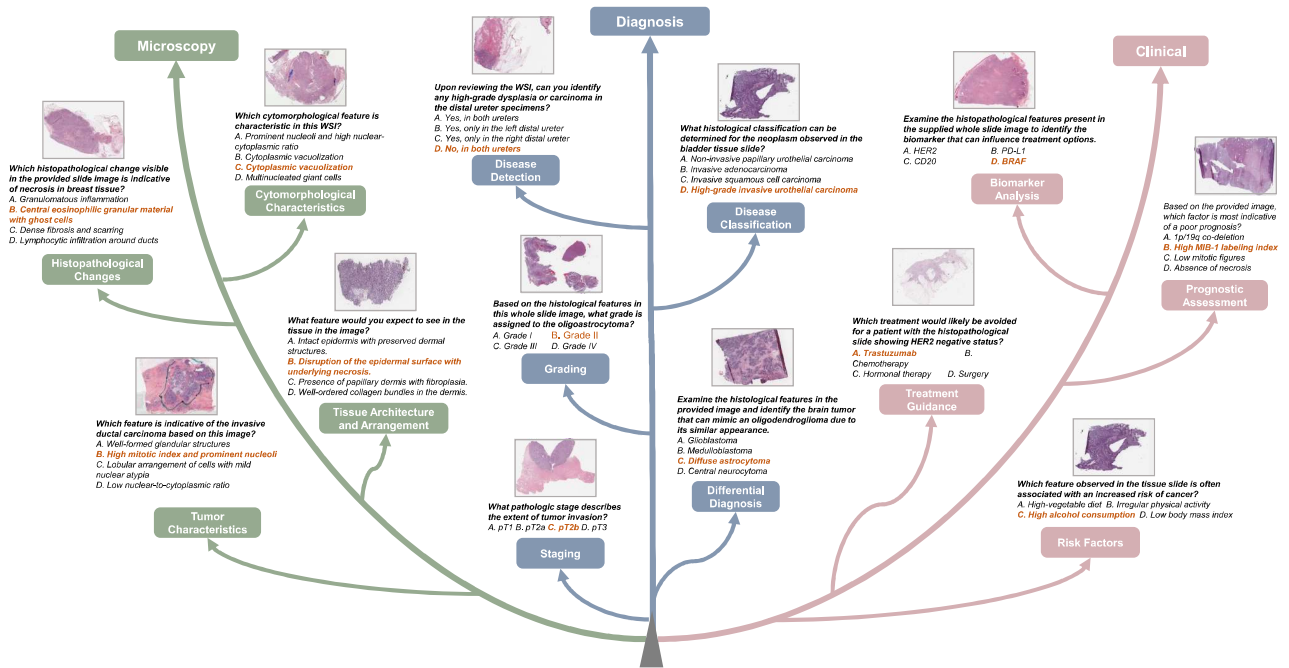

Figure 6. Examples of generated structural VQAs in pathology across Microscopy, Diagnosis, and Clinical scenarios.

sion, and specific patterns associated with different types of tumors.

- **Histopathological Changes:** This category should include questions that evaluate the recognition and description of pathological changes in tissue, such as necrosis, inflammation, fibrosis, and other alterations that indicate disease processes.

**Diagnosis** This category tests the ability of models to suggest a reasonable diagnosis based on histological images and relevant clinical context:

- **Disease Detection:** Questions in this category should evaluate the model's ability to identify the presence or absence of a disease based on histological features and clinical information.
- **Disease Classification:** These questions should focus on distinguishing between different types or subtypes of diseases, assessing the model's capability to classify conditions accurately based on morphological and histopathological criteria.
- **Grading:** Questions under this category should assess the model's ability to determine the grade of a disease, particularly tumors, based on the degree of differentiation and cellular atypia observed in histological images.
- **Staging:** This category should include questions that evaluate the ability to assign a stage to a disease, particularly in oncology, by assessing the extent of disease

spread and involvement of surrounding tissues or organs.

- **Differential Diagnosis:** Questions should test the model's ability to provide a differential diagnosis, distinguishing between multiple potential conditions that may present with similar histological and clinical features.

**Clinical** This category tests the ability of models to retrieve and apply clinically relevant background knowledge about diseases:

- **Treatment Guidance:** Questions in this category should assess the model's ability to recommend appropriate treatment options based on the disease in question, considering factors such as disease stage, patient demographics, and any specific clinical guidelines.
- **Prognostic Assessment:** These questions should focus on evaluating the model's ability to predict the likely course and outcome of a disease, including survival rates, potential complications, and long-term outcomes based on clinical and pathological data.
- **Risk Factors:** Questions under this category should test the model's knowledge of risk factors associated with specific diseases, including genetic, environmental, and lifestyle factors that may influence disease development or progression.
- **Biomarker Analysis:** This category should include questions that evaluate the ability to identify and interpret biomarkers relevant to the diagnosis, prognosis, or treat-

ment of diseases, emphasizing their role in personalized medicine and targeted therapy.

6.3.2. Designed Prompts  
Report Cleaning Prompt.

**Report Cleaning Prompt.** The prompt used to clean up the report from the original TCGA report is represented in Tab. 7. This process effectively eliminates extraneous noise from the report, thereby establishing a more solid foundation for caption and QA pairs generation.

Table 7. Prompts for report clean and caption generation.

**[Report Clean Prompt]** This is the content from the pathology report. Please remove some redundant irrelevant information from the original report, such as technical details of pathology department procedures, Symbols unrelated to the pathological report, specimen handling and processing information, redundant administrative or legal statements, and some repeated information. Show me the cleaned report content.

**[Caption Generation Prompt]** Based on the above pathological report content, generate a detailed paragraph that summarizes the essential pathological findings. The paragraph should include key information such as the diagnosis, tumor characteristics, margin status, lymph node involvement, and other relevant pathological findings. The summary should not mention the source being a report and should exclude any specific sizes or measurements. The paragraph should be written in a clear and cohesive manner, covering all important points without unnecessary details.

**Caption Generation Prompt.** The prompt used for caption generation from the refined report is detailed in Tab. 7, ensuring that the generated caption effectively captures essential summarized information in report.

**Question-Answers Generation Prompt.** The prompt used to extract QA from reports mainly consist of 4 parts (i.e., <Cleaned Report>+ System Prompt + Objective Prompt + General Prompt), and the detailed content of each part is illustrated in Tab. 8

**Label Transformation Prompt.** The prompt for transforming BCNB dataset is illustrated in Tab. 9. We employ GPT to transform individual labels into a question-answer format based on the task type and corresponding classification labels, facilitating the testing of MLLM. For instance, in the context of a tumor type classification task,

Table 8. Question-Answers generation prompts, including system prompt, general prompt and objective prompt.

**[System Prompt]** You are an AI assistant proficient in digital pathology. You will receive a pathology report for whole slide images.

**[General Prompt]** Based on the above pathological report content, your task is to use the provided information, create 2 multi-choice questions and 2 short-answer questions for each narrow category. The design question should be able to be answered based on the content of the image. Design medical questions very carefully and only ask questions when you are sure of the answer. Answers should be specific and avoid ambiguity. When generating questions, it is necessary to indicate their broad category and narrow category. For multi-choice questions, you should (1) “question type” is “multi-choice questions”. (2) Provide the options and answer and reasoning. Provide four answer choices (A, B, C, and D), ensuring that one choice is correct and the other three are plausible but incorrect. (3) Aim to include one answer that is incorrect but very similar to the correct one to increase the difficulty level. For short-answer questions: (1) “question type” is “short-answer questions”. (2) Generating questions with different content from multiple-choice questions. For all questions: (1) Do not mention that the information source is report in “question”, “answer”. (2) Return JSON format in “question type”: xxx, “question”: xxx, “options”: [], “answer”: xxx, “broad category”: xxx, “narrow category”: xxx for each question. The “options” section is empty for short-answer questions.

**[Objective Prompt]** Definition of Broad Category and its corresponding Narrow Categories. “The required broad category is Microscopy, which involves assessing the ability to generate microscopy descriptions of pathology images, focusing on clinically relevant features. For the narrow category: Tissue Architecture and Arrangement: Questions should evaluate the understanding of overall tissue structure and spatial organization within a histological section.”

<Task>represents “Tumor Type”, while <label 1>, <label 2>, and <label 3>are “Invasive ductal carcinoma”, “Invasive lobular carcinoma”, and “Other Type”, respectively, enabling the generation of relevant QA pairs.

6.4. Multimodal Dataset Comparison

Recently, several multimodal pathology datasets have been introduced for pathology applications. However, these datasets are often constrained in both scope and scale, as they primarily focus on either patch-level analysis or limited

Table 9. Prompt for Converting Labels into QA Pairs

**[Label Transformation Prompt]** Please create prompts for pathology image classification tasks concerning `<Task>`, transforming traditional labels into a multi-choice question-and-answer format. The original labels include `<label 1>`, `<label 2>`, ...

available data. In contrast, our proposed SlideInstruction and SlideBench, provided as open-source resources, significantly expand the dataset size while enhancing its versatility, as shown in Tab. 10.

Table 10. Comparisons of our datasets with other pathology datasets.

| Dataset                | Level | Data Type             | Curation Type | Scope | Number  | Availability |
|------------------------|-------|-----------------------|---------------|-------|---------|--------------|
| PathChat [21]          | Patch | Patch and Q/A pairs   | Human+GPT     | -     | 257,004 | ✗            |
| Quilt-Instruct [23]    | Patch | Patch and Q/A pairs   | GPT           | -     | 107,131 | ✓            |
| WSI-VQA [8]            | Slide | WSI and Q/A pairs     | GPT           | -     | 8,672   | ✓            |
| PathText [7]           | Slide | WSI-Caption pairs     | GPT           | -     | 9,009   | ✓            |
| HistGen [13]           | Slide | WSI-Reports pairs     | GPT           | -     | 7,753   | ✓            |
| Prov-Path [31]         | Slide | WSI-Reports pairs     | GPT           | -     | 17,383  | ✗            |
| CR-PathNarratives [34] | Slide | WSIs with annotations | Human         | -     | 174     | ✗            |
| PathAlign [3]          | Slide | WSI-Reports pairs     | Human         | -     | 354,089 | ✗            |
| Our SlideInstruction   | Slide | WSI and Q/A pairs     | GPT           | 13    | 179,935 | ✓            |
| Our SlideBench         | Slide | WSI and Q/A pairs     | Human+GPT     | 13    | 15,835  | ✓            |

## 7. Experiment

### 7.1. Computational Cost Analysis

To evaluate the computational cost of our model architecture, we measured both the inference time and GPU memory consumption throughout the entire pipeline. This pipeline includes the patch-level encoder, slide-level encoder, multimodal projector module, and large language model, all executed on an A100 GPU. After extracting the local and global features of WSIs, the average response time was within 1 second, and GPU memory consumption was approximately 27 GB. The inference time and GPU memory consumption remained well within acceptable limits for gigapixel whole slide images.

### 7.2. Implementation Details

We preprocessed each WSI by segmenting it into  $224 \times 224$  nonoverlapping patches at a  $20\times$  magnification level, excluding background regions. We implemented our model using the Xtuner [11] toolkit and trained it across two stages on  $8 \times$  NVIDIA A100 GPUs. The training process consists of an alignment phase followed by instruction fine-tuning: Stage 1: We freeze the LLM and train the Projection and Slide Encoder with WSI-caption data for 3 epochs, using a learning rate of 0.001. Stage 2: We unfreeze the LLM, Slide Encoder, and Projection, training the model on WSI

instruction-following data for 1 epoch, with a learning rate of 0.00002. Both stages are optimized using AdamW.

## 7.3. Ability Showcase

### 7.3.1. Captioning Ability

The examples shown in Fig. 7 illustrate the capability of our model, SlideChat, to effectively perform whole-slide image captioning tasks. SlideChat demonstrates its proficiency in generating detailed and contextually accurate summaries for complex pathological whole-slide images, accurately capturing key clinical findings and pathological features. Whether summarizing broad findings, explaining pivotal details, or highlighting core results, SlideChat showcases an advanced understanding of whole-slide images, providing concise yet informative reports that align with clinical terminology and expectations.

### 7.3.2. VQA Ability

Fig. 8 showcases the conversational examples of SlideChat, demonstrating its ability to accurately answer a range of questions based on WSIs, covering diverse aspects such as histological classifications, tumor grading, lymph node involvement, and treatment decisions. SlideChat effectively interprets complex pathological data, engages in nuanced question-and-answer exchanges, and delivers clinically relevant responses. This reflects its potential as an intelligent assistant capable of supporting pathologists in diagnostic decision-making by providing insightful, context-aware dialogue grounded in visual pathology data.

### 7.3.3. Comparing Model Outputs

Fig. 9 presents a comparative analysis of the outputs from SlideChat and other models within SlideBench. The examples illustrate SlideChat’s remarkable capacity to precisely classify tumors, identify distinct histological features, and describe the structural organization of tumor cells from WSIs. SlideChat demonstrates a unique proficiency in capturing both local and global features—seamlessly integrating detailed microscopic characteristics with broader contextual understanding to deliver accurate and clinically meaningful interpretations. In contrast, existing models are limited to processing small pathology images, often yielding ambiguous or incorrect classifications. This underscores SlideChat’s advanced capability in comprehending whole-slide images by incorporating both intricate details and a comprehensive visual perspective.

## 7.4. Detailed Test Performance

### 7.4.1. Performance on SlideBench-VQA (TCGA)

The results presented in the tables demonstrate a comprehensive evaluation of SlideChat’s performance on SlideBench-VQA (TCGA) in comparison to other existing models across microscopy, diagnosis, and clinical tasks. In

| SlideBench-VQA(TCGA) <b>Microscopy</b> |           |                                     |                       |                                   |                           |                   |  |
|----------------------------------------|-----------|-------------------------------------|-----------------------|-----------------------------------|---------------------------|-------------------|--|
| Method                                 | Input     | Tissue Architecture and Arrangement | Tumor Characteristics | Cytomorphological Characteristics | Histopathological Changes | Overall           |  |
| Random                                 | Text      | 23.70                               | 22.42                 | 23.63                             | 27.80                     | 24.44             |  |
| GPT-4                                  |           | 40.83                               | 40.28                 | 41.71                             | 37.46                     | 39.62             |  |
| GPT-4o                                 | Patch     | 65.94                               | 66.20                 | 60.10                             | 59.23                     | 62.89             |  |
| MedDr                                  |           | 75.04                               | 75.78                 | 70.10                             | 72.23                     | 73.30             |  |
| LLaVA-Med                              |           | 50.04                               | 40.63                 | 40.38                             | 56.95                     | 47.34             |  |
| Quilt-LLaVA                            |           | 65.26                               | 54.04                 | 50.66                             | 59.55                     | 57.76             |  |
| GPT-4o                                 | Slide (T) | 37.07                               | 38.76                 | 39.93                             | 37.60                     | 38.28             |  |
| MedDr                                  |           | 71.58                               | 71.27                 | 69.87                             | 69.05                     | 70.48             |  |
| LLaVA-Med                              |           | 51.80                               | 45.02                 | 36.27                             | 49.01                     | 45.82             |  |
| Quilt-LLaVA                            |           | 53.59                               | 45.37                 | 43.09                             | 53.24                     | 49.12             |  |
| SlideChat                              | Slide     | 88.07<br>(+13.03)                   | 87.01<br>(+11.23)     | 88.02<br>(+17.92)                 | 87.36<br>(+15.13)         | 87.64<br>(+14.34) |  |

  

| SlideBench-VQA(TCGA) <b>Diagnosis</b> |           |                   |                        |                   |                   |                        |                   |
|---------------------------------------|-----------|-------------------|------------------------|-------------------|-------------------|------------------------|-------------------|
| Method                                | Input     | Disease Detection | Disease Classification | Staging           | Grading           | Differential Diagnosis | Overall           |
| Random                                | Text      | 25.82             | 24.06                  | 24.14             | 26.12             | 24.40                  | 24.91             |
| GPT-4                                 |           | 27.12             | 31.07                  | 22.27             | 27.45             | 38.70                  | 29.09             |
| GPT-4o                                | Patch     | 50.27             | 55.94                  | 39.94             | 39.66             | 49.66                  | 46.69             |
| MedDr                                 |           | 59.11             | 61.11                  | 48.66             | 52.97             | 68.83                  | 57.78             |
| LLaVA-Med                             |           | 37.25             | 28.57                  | 30.41             | 20.71             | 47.27                  | 32.78             |
| Quilt-LLaVA                           |           | 40.74             | 39.3                   | 32.32             | 28.96             | 39.52                  | 35.96             |
| GPT-4o                                | Slide (T) | 22.95             | 26.76                  | 18.06             | 21.06             | 27.82                  | 23.10             |
| MedDr                                 |           | 54.29             | 56.40                  | 48.66             | 43.52             | 61.61                  | 52.47             |
| LLaVA-Med                             |           | 27.87             | 25.19                  | 24.07             | 24.96             | 36.18                  | 27.58             |
| Quilt-LLaVA                           |           | 32.47             | 28.25                  | 20.18             | 22.96             | 32.25                  | 26.97             |
| SlideChat                             | Slide     | 80.90<br>(+21.79) | 76.12<br>(+15.01)      | 68.41<br>(+19.75) | 68.39<br>(+15.42) | 73.72<br>(+4.89)       | 73.27<br>(+15.49) |

microscopy, SlideChat significantly outperforms its counterparts, achieving a notable overall accuracy improvement of 14.34 points over the nearest model. This strong performance is consistent across sub-tasks, such as tissue architecture analysis, tumor characteristics identification, and cytomorphological assessment, showcasing SlideChat’s advanced capability to analyze both detailed cellular structures and broader histopathological changes. In the diagnostic tasks, SlideChat also demonstrates superior accuracy, with an overall gain of 15.49 points, excelling in disease detection, classification, staging, grading, and differential diagnosis. The clinical analysis results further validate the model’s strength, with SlideChat outperforming other methods by 10.01 points overall, particularly excelling in treatment guidance, biomarker analysis, and risk factor assessment. These results illustrate SlideChat’s capability to seamlessly handle complex medical data and deliver reliable insights across multiple clinical and diagnostic domains, indicating its potential as a robust tool for comprehensive pathology analysis.

#### 7.4.2. Performance on SlideBench-VQA (BCNB)

The evaluation of SlideChat on SlideBench-VQA (BCNB), a real-world dataset designed for zero-shot testing, further underscores its ability to generalize effectively to unseen data. SlideChat demonstrates an overall accuracy improvement of 12.71 points compared to other models, showcasing its ability to generalize well across diverse and complex breast cancer-related tasks. SlideChat’s performance is particularly strong in identifying tumor type, ER status, PR status, and HER2 status, demonstrating a nuanced understanding of critical histopathological features. Nevertheless, in the more complex tasks of HER2 Expression, Histological Grading, and Molecular Subtype classification, SlideChat still exhibits potential for improvement, highlighting specific areas that warrant further refinement to enhance its overall performance.



| Method      | Input     | SlideBench-VQA(TCGA) <b>Clinical</b> |                    |                  |                       | Overall           |
|-------------|-----------|--------------------------------------|--------------------|------------------|-----------------------|-------------------|
|             |           | Treatment Guidance                   | Biomarker Analysis | Risk Factors     | Prognostic Assessment |                   |
| Random      | Text      | 23.62                                | 31.87              | 24.36            | 24.33                 | 26.44             |
| GPT-4       |           | 49.98                                | 44.63              | 46.46            | 39.64                 | 45.00             |
| GPT-4o      | Patch     | 64.18                                | 57.99              | 76.99            | 66.64                 | 66.77             |
| MedDr       |           | 74.18                                | 82.99              | 82.43            | 60.66                 | 74.25             |
| LLaVA-Med   |           | 62.04                                | 53.98              | 53.04            | 26.54                 | 47.96             |
| Quilt-LLaVA |           | 64.79                                | 40.42              | 63.40            | 43.06                 | 53.07             |
| GPT-4o      | Slide (T) | 50.00                                | 50.08              | 44.16            | 32.64                 | 43.42             |
| MedDr       |           | 71.43                                | 84.51              | 78.92            | 60.24                 | 72.80             |
| LLaVA-Med   |           | 50.50                                | 48.01              | 48.90            | 19.88                 | 40.84             |
| Quilt-LLaVA |           | 47.38                                | 32.93              | 47.71            | 48.64                 | 44.76             |
| SlideChat   | Slide     | 83.42<br>(+9.24)                     | 89.04<br>(+4.53)   | 91.71<br>(+9.28) | 74.93<br>(+8.29)      | 84.26<br>(+10.01) |

| Method      | Input     | SlideBench-VQA(BCNB) |                  |                 |                  |                  |                      |                   | Overall           |
|-------------|-----------|----------------------|------------------|-----------------|------------------|------------------|----------------------|-------------------|-------------------|
|             |           | Tumor Type           | ER Type          | PR Type         | HER2 Type        | HER2 Expression  | Histological Grading | Molecular Subtype |                   |
| Random      | Text      | 23.82                | 24.48            | 25.05           | 25.05            | 24.39            | 24.41                | 23.63             | 24.40             |
| GPT-4       |           | 0                    | 0                | 0               | 0                | 0                | 0                    | 0                 | 0                 |
| GPT-4o      | Patch     | 34.69                | 77.50            | 63.51           | 36.95            | 23.95            | 28.63                | 23.15             | 41.43             |
| MedDr       |           | 45.46                | 23.53            | 25.99           | 71.81            | 22.73            | 30.28                | 15.49             | 33.67             |
| LLaVA-Med   |           | 23.95                | 36.62            | 40.19           | 50.76            | 23.72            | 18.99                | 15.05             | 30.10             |
| Quilt-LLaVA |           | 77.14                | 68.58            | 42.63           | 58.17            | 23.18            | 18.23                | 19.82             | 44.43             |
| GPT-4o      | Slide (T) | 0                    | 0                | 0               | 0                | 0                | 0                    | 0                 | 0                 |
| MedDr       |           | 28.92                | 45.84            | 25.71           | 72.68            | 20.65            | 29.96                | 23.88             | 35.48             |
| LLaVA-Med   |           | 0.01                 | 0                | 0.01            | 0.02             | 0                | 0                    | 0                 | 0.01              |
| Quilt-LLaVA |           | 67.41                | 66.73            | 36.58           | 62.67            | 15.97            | 22.89                | 16.27             | 41.55             |
| SlideChat   | Slide     | 90.17<br>(+44.71)    | 78.54<br>(+1.04) | 68.81<br>(+5.3) | 71.93<br>(-0.75) | 25.05<br>(+0.66) | 23.11<br>(-7.17)     | 17.49<br>(-6.39)  | 54.14<br>(+12.71) |

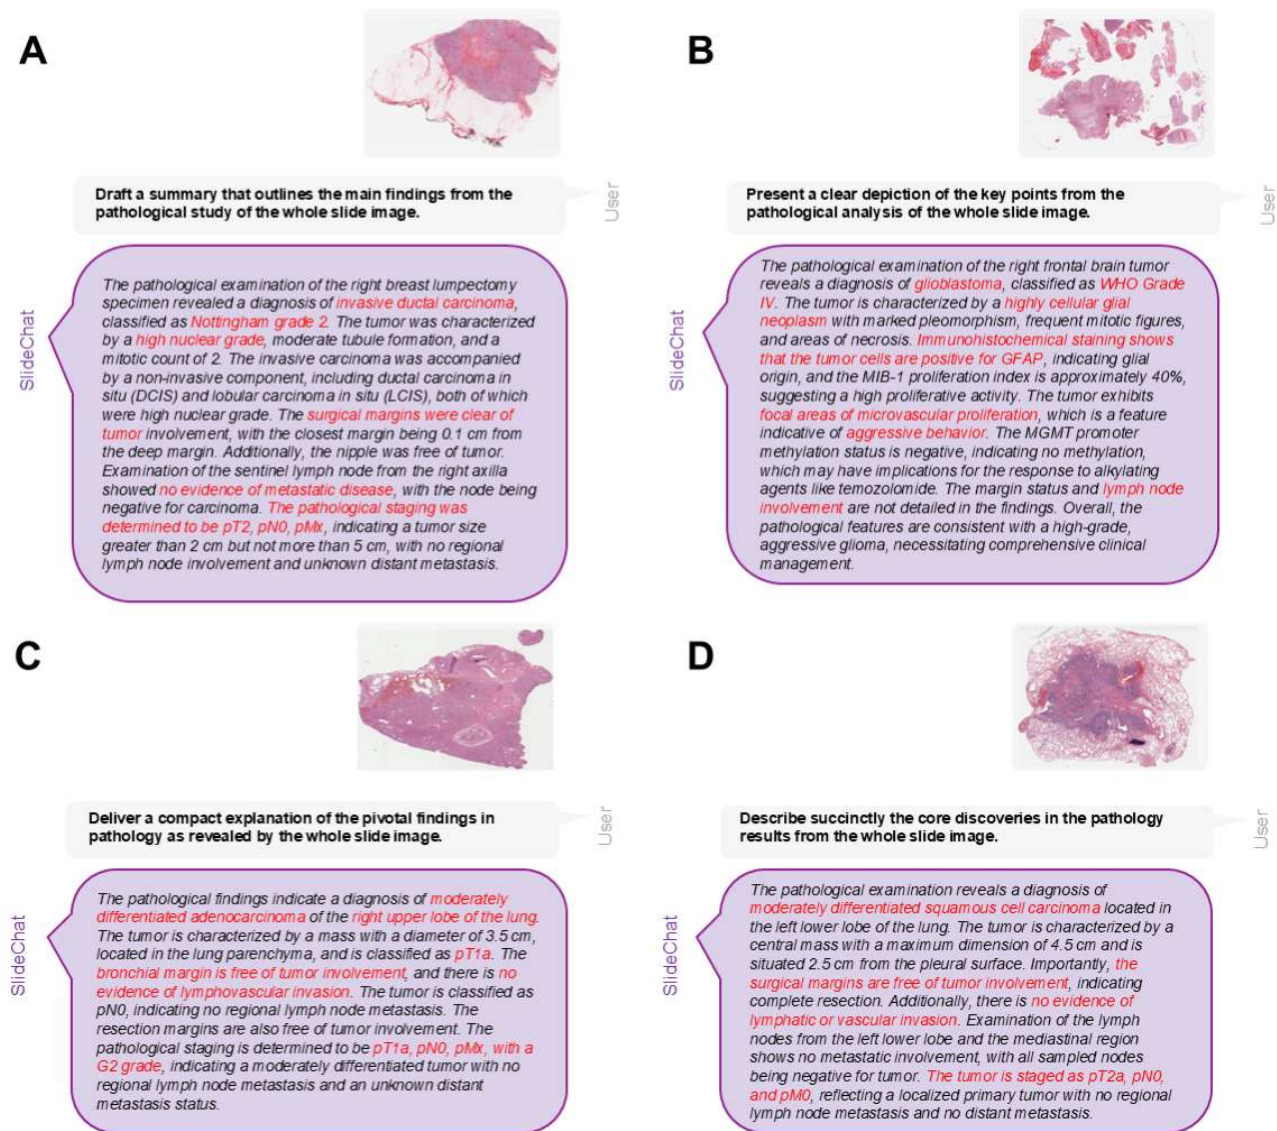

Figure 7. Demonstration of SlideChat's Capability in Whole-Slide Image Captioning.

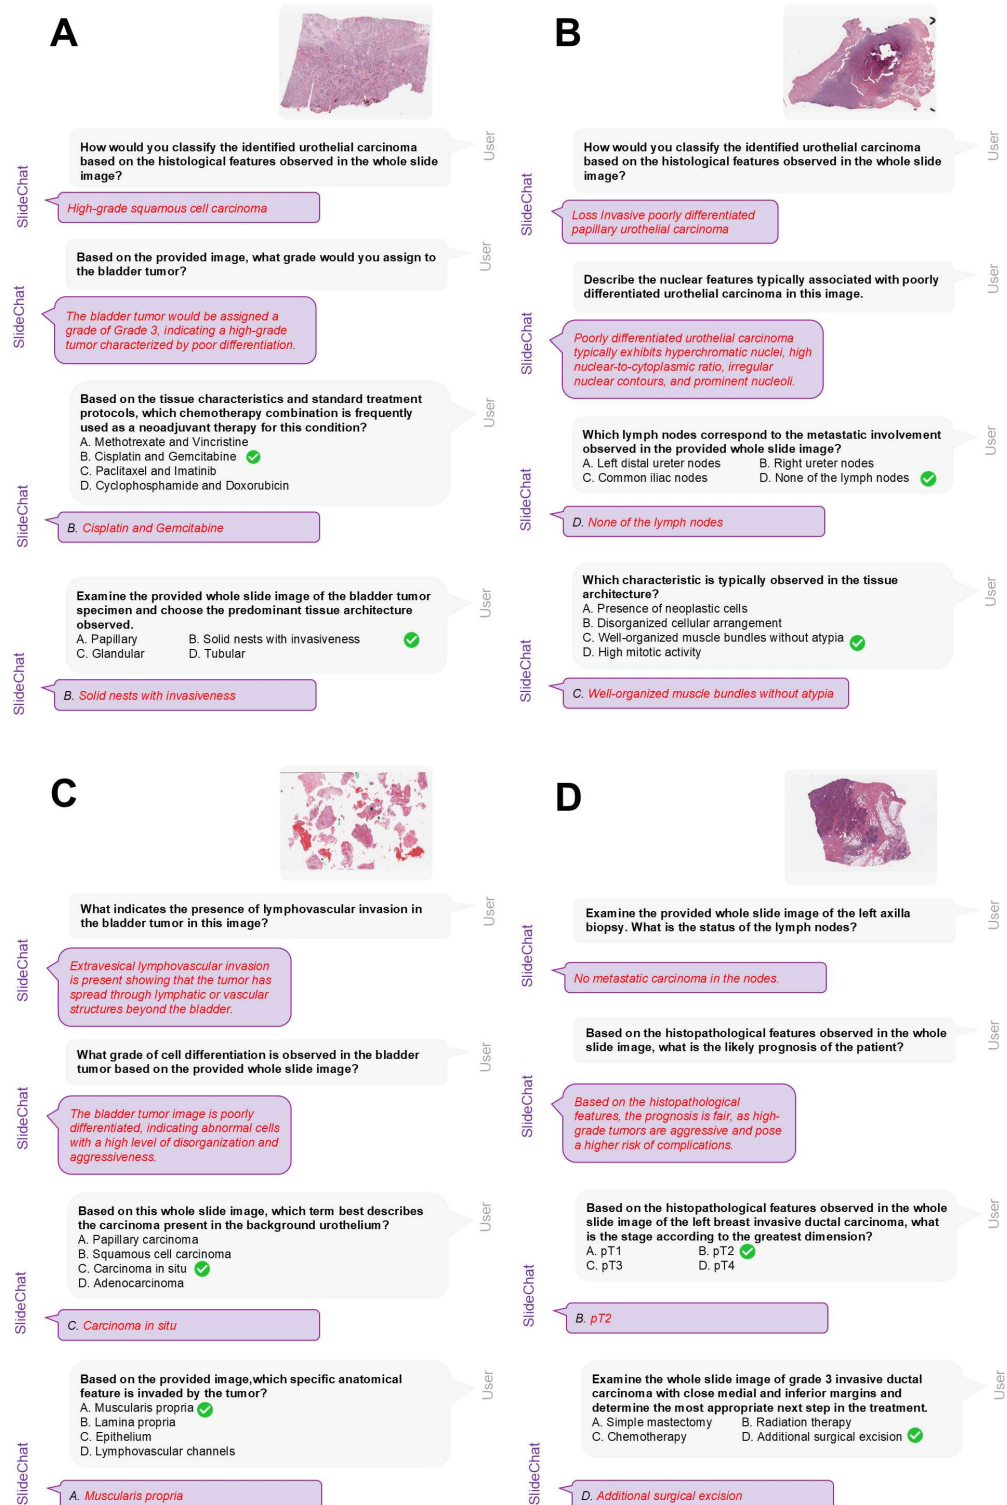

Figure 8. Demonstration of our SlideChat for answering various questions based on the WSI.



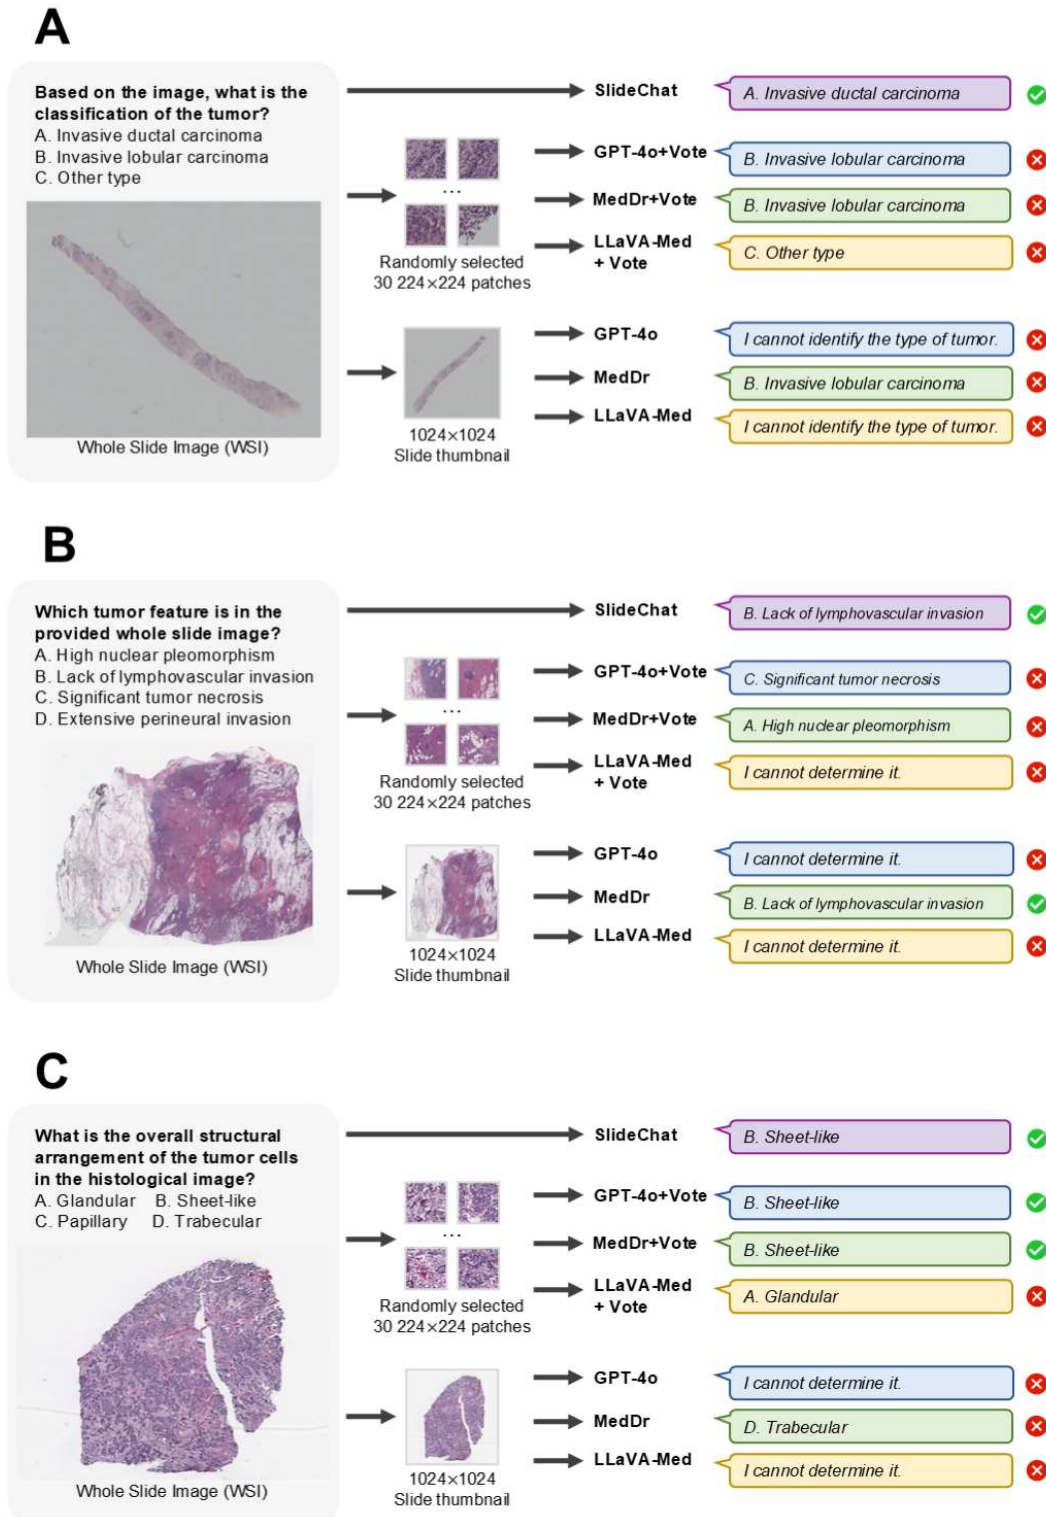

Figure 9. Comparing model outputs on SlideBench.
